# Supplementary material for: Synthesis, Crystal Structures, and Spectroscopic Characterization of Bis-aldehyde Monomers and Their Electrically Conductive Pristine Polyazomethines
Source: MDPI journal article supplement (doi:10.3390/polym11091498), 2019-09-13
Supplement: s1 [file s1]

Supporting Information

# Synthesis, Crystal Structures and Spectroscopic Characterization of *bis*-aldehyde Monomers and Their Electrically Conductive Pristine Polyazomethines

Abdul Hafeez<sup>a</sup>, Zareen Akhter<sup>a\*</sup>, John F. Gallagher<sup>b</sup>, Nawazish Ali Khan<sup>c</sup>, Asghari Gul<sup>d</sup> and Faiz Ullah Shah<sup>e\*</sup>

<sup>a</sup>. Department of Chemistry, Quaid-i-Azam University, Islamabad 45320, Pakistan

<sup>b</sup>. School of Chemical Sciences, Dublin City University, Glasnevin, Dublin 9, Ireland

<sup>c</sup>. Materials Science Laboratory, Department of Physics, Quaid-i-Azam University, Islamabad 45320, Pakistan

<sup>d</sup>. Department of Chemistry, COMSATS University, Islamabad, Pakistan.

<sup>e</sup>. Chemistry of Interfaces, Luleå University of Technology, 971 87 Luleå, Sweden

\*. Corresponding authors. [zareenakhter@yahoo.com](mailto:zareenakhter@yahoo.com) and [faiz.ullah@ltu.se](mailto:faiz.ullah@ltu.se)

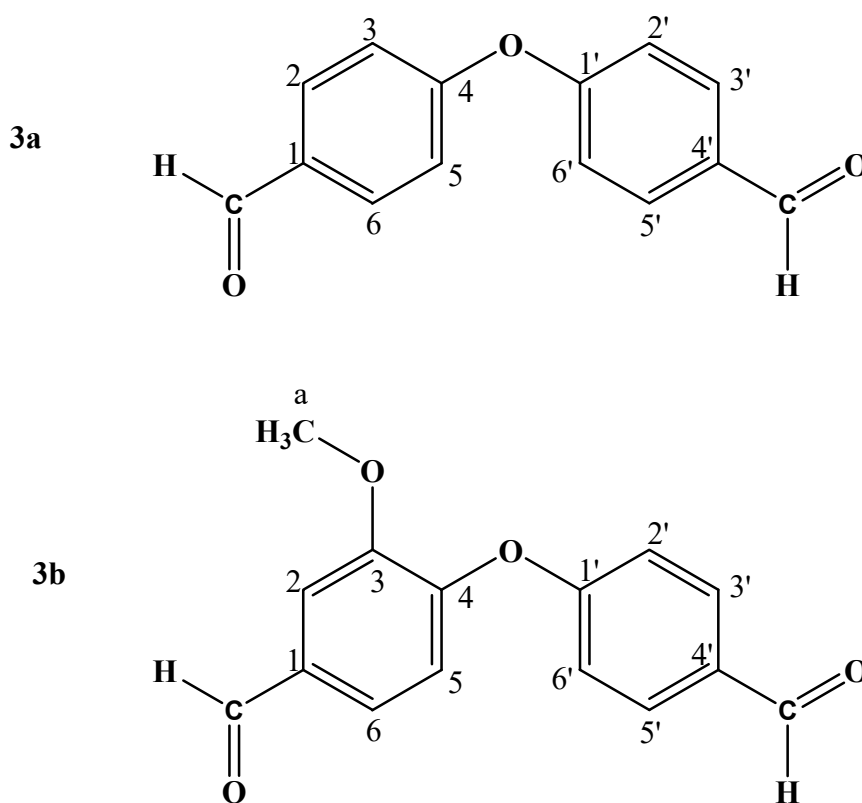

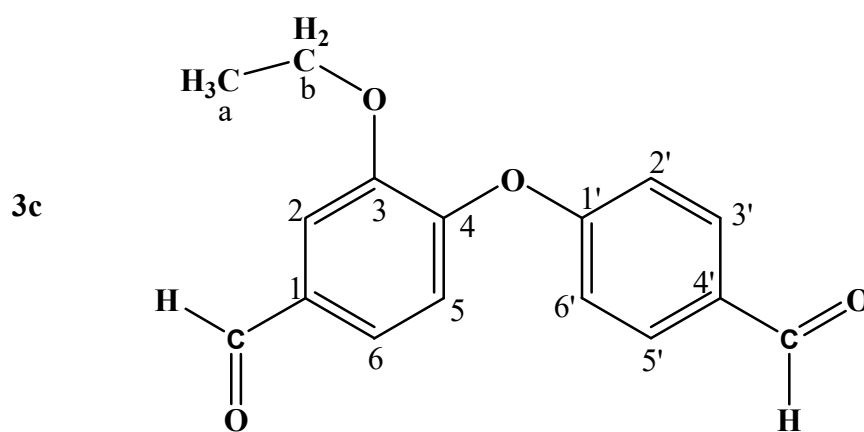

Figure S1. Labelling of monomers.

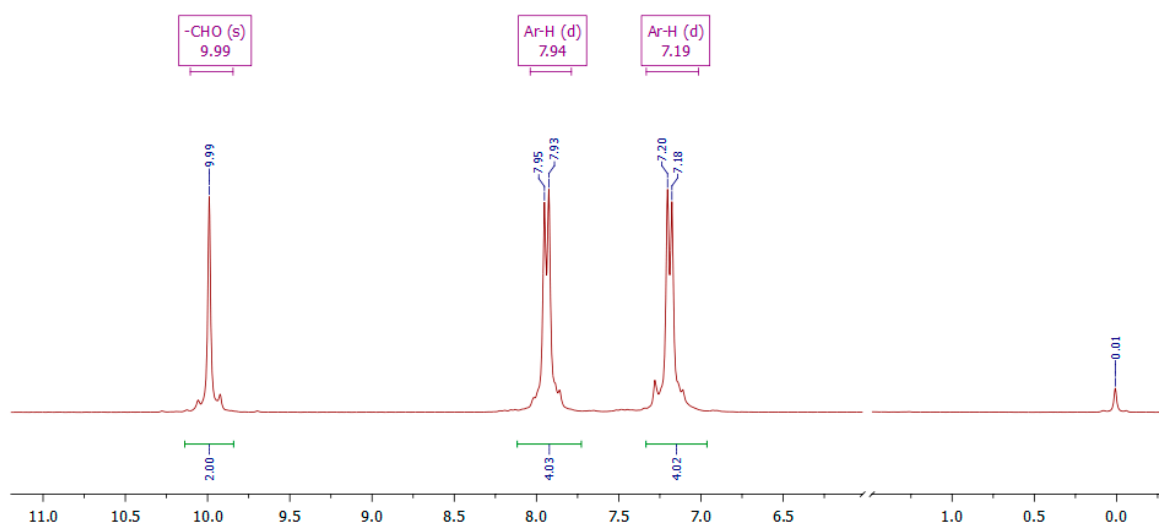

Figure S2. Proton NMR of 3a monomer.

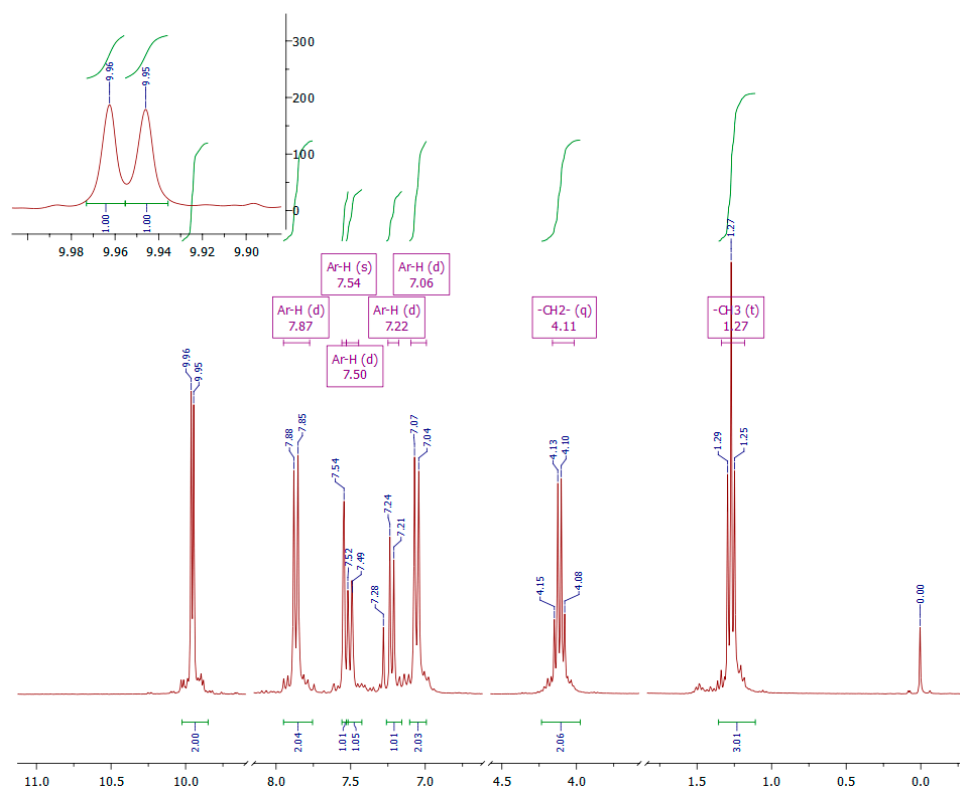

Figure S3. Proton NMR of 3c monomer.

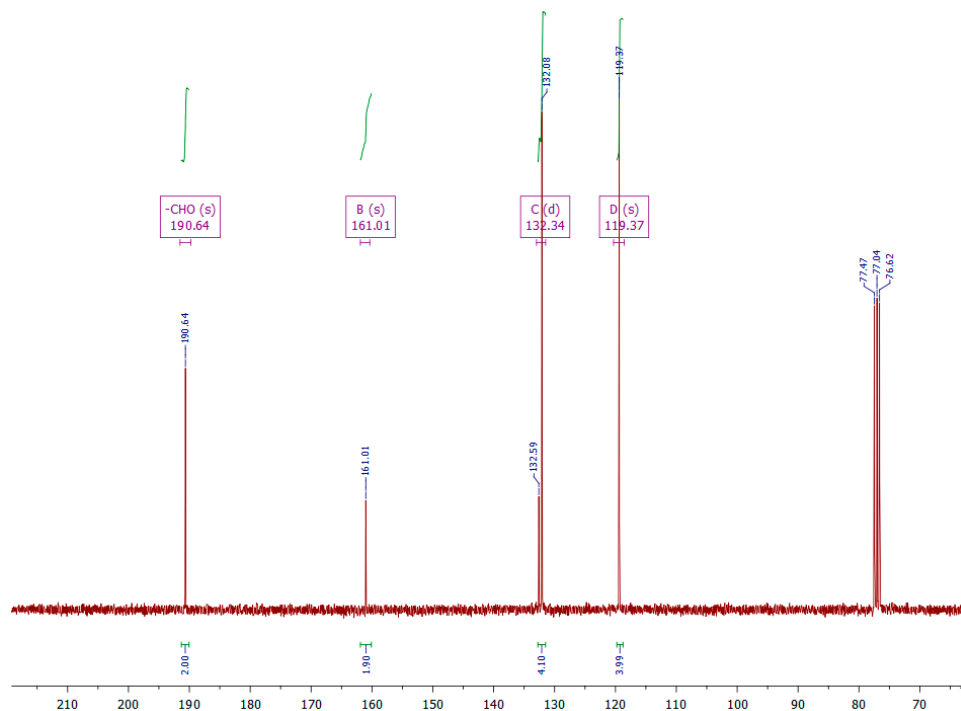

Figure S4. Carbon-13 NMR of 3a monomer.

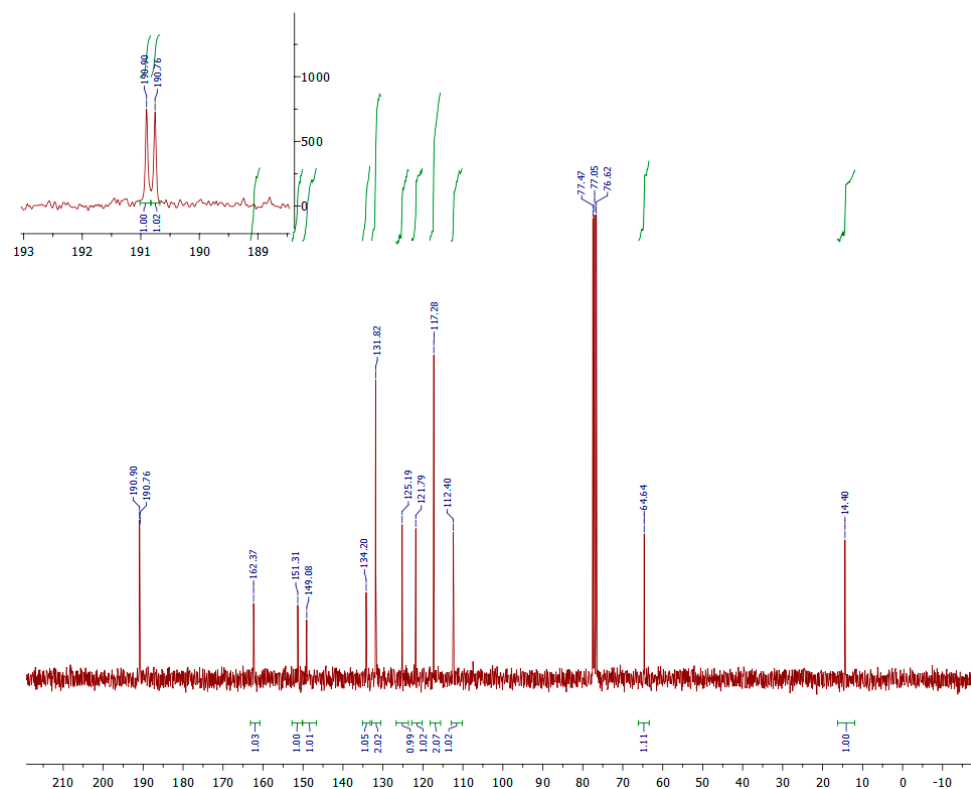

Figure S5. Carbon-13 NMR of 3c monomer.

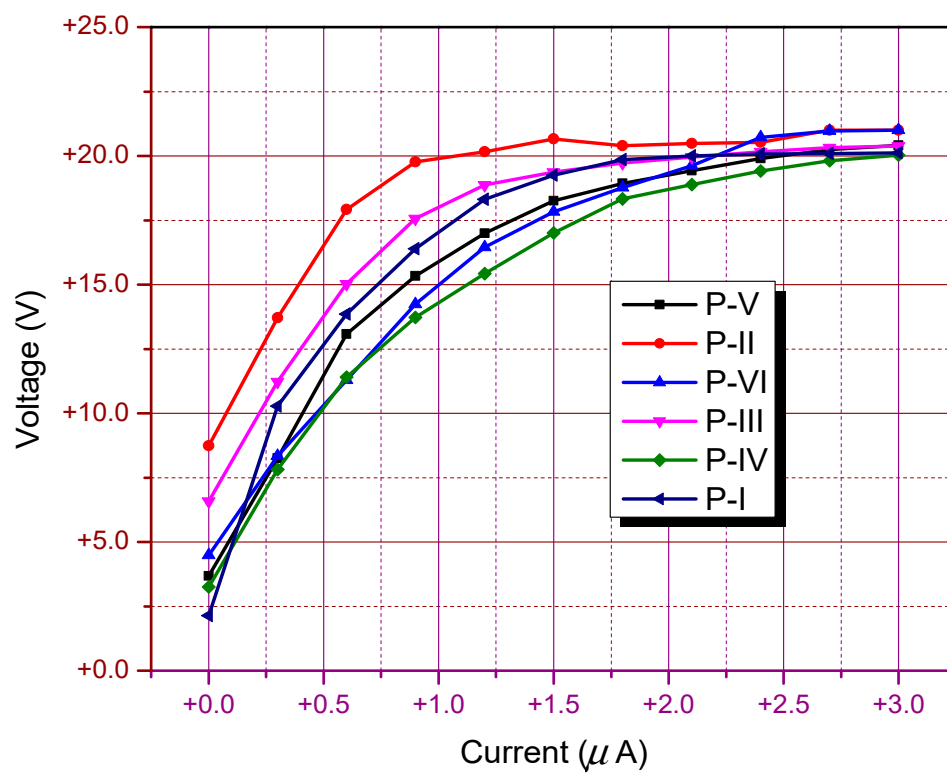

Figure S6. current vs voltage (I-V) curves of polyazomethines polymers.

### Organosolubility and inherent viscosities

The organosolubility of polymeric azomethines was checked at 30 °C in various solvents such as *n*-hexane, DMF, DMSO, NMP, CHCl<sub>3</sub> and sulfuric acid by dissolving 10 mg powdered polymer sample in 1 mL of solvent and the results are presented in Table S1. It was found that the polymers synthesized from non-substituted aromatic dialdehyde (*i.e.* 3a) were almost insoluble in most of the solvents whereas others having –OCH<sub>3</sub>, and –OC<sub>2</sub>H<sub>5</sub> showed reasonable solubility in all the solvents. The limited solubility of wholly aromatic polyazomethines may be attributed to the chain rigidity, regularity and inter-chain packing efficiency. It may also be noted that the polymer **P-I** and **P-IV** showed semi-crystalline characteristics in powder XRD which reinforces the fact that polymer chains stacked over one another. However, all the polymeric azomethines showed good solubility in *conc.* H<sub>2</sub>SO<sub>4</sub> at room temperature and Table S1 shows the respective solubility behavior of polyazomethines in aforementioned solvents. The polymers had viscosity in the range 1.98–1.72, as shown in Table S2.

**Table S1.** Organosolubility of polyazomethines in common organic solvents.

| Polymer      | <i>n</i> -hexane | DMF | DMSO | NMP | CHCl <sub>3</sub> | H <sub>2</sub> SO <sub>4</sub> |
|--------------|------------------|-----|------|-----|-------------------|--------------------------------|
| <b>P-I</b>   | --h              | --h | --h  | --h | --h               | +++                            |
| <b>P-II</b>  | --h              | +++ | ++h  | ++h | +++               | +++                            |
| <b>P-III</b> | --h              | +++ | +++  | +++ | +++               | +++                            |
| <b>P-IV</b>  | --h              | --h | --h  | --h | --h               | +++                            |
| <b>P-V</b>   | --h              | +–h | +–h  | +–h | +–h               | +++                            |
| <b>P-VI</b>  | --h              | ++h | ++h  | +–h | +++               | +++                            |

+++ = soluble at room temperature, +–h = partially soluble on heating

--h = insoluble on heating, ++h = soluble on heating

**Table S2.** Viscometric Data of polyazomethine Polymers.

| Code         | $\eta_{rel}$ | $\eta_{sp}$ | $\eta_{red}$ (dl/g) | $\eta_{inh}$ (dl/g) |
|--------------|--------------|-------------|---------------------|---------------------|
| <b>P-I</b>   | 1.17         | 0.17        | 0.86                | 1.77                |
| <b>P-II</b>  | 1.25         | 0.25        | 1.28                | 1.84                |
| <b>P-III</b> | 1.12         | 0.12        | 0.60                | 1.72                |
| <b>P-IV</b>  | 1.136        | 0.14        | 0.68                | 1.74                |
| <b>P-V</b>   | 1.45         | 0.45        | 2.25                | 1.98                |
| <b>P-VI</b>  | 1.18         | 0.18        | 0.94                | 1.78                |
